# Supplementary material for: Novel 36-membered dodecanuclear manganese metalladiazamacrocycle
Source: Royal Society of Chemistry journal article supplement (doi:10.1039/b407668k), 2004-01-01
Supplement: b407668k.pdf [file b407668k.pdf]

**Supplementary data**  
**Novel 36-membered dodecanuclear manganese  
metalladiazamacrocycle**

**Rohith P. John, Kyungjae Lee and Myoung Soo Lah\***

Department of Chemistry and Applied Chemistry, College of Science and Technology,  
Hanyang University, Ansan, Kyunggi-do 426-791, Korea, E-mail:  
[mslah@hanyang.ac.kr](mailto:mslah@hanyang.ac.kr)

Contents:

1. Preparation of the ligand and analytical data
2. Details of crystal data collection
3. Figure S1. Schematic diagram showing  $\Lambda$  configuration of the central metal ion in the metalladiazamacrocycle

**Synthesis of ligand *N-trans-2-pentenoylsalicyclichydrazide (1)*:** To a 20mL of chloroform solution at 0°C, containing 1.544 mL (11mmol) of triethylamine and 1.032gm (10mmol) of *trans*-2-pentenoic acid was added a 1.244 mL (10 mmol) of trimethylacetyl chloride with stirring. The solution is then brought slowly to room temperature. After stirring for 20 minutes 1.398 gm (9 mmol) of salicylic hydrazide was added to it and continued stirring for another 30 minutes. It is then layered with 10ml of hexane; a white suspension appears which is then left aside for complete precipitation. The product obtained was filtered, washed successively with a 1:1 mixture of chloroform and hexane, and then with ether. The compound was recrystallised from ethanol to yield 1.502 gm (71%). Anal. Calc for C<sub>12</sub>H<sub>14</sub>N<sub>2</sub>O<sub>3</sub>: C 61.53, H 6.02, N 11.96 %, Found C 61.85, H 6.54, N 11.76 %; ESI mass spectrum: m/z 235.1 (M+1)<sup>+</sup>; <sup>1</sup>H NMR spectrum (300 MHz, DMSO-*d*<sup>6</sup>, ppm, Hz): 11.89 (s (br), 1H, NH), 10.70 (s (br), 1H, NH), 10.40 (s, 1H, OH), 7.91 (d, 1H, J = 7.8), 7.44 (t, 1H, J = 7.8), 6.96 (d, 1H, J = 8.0), 6.94 (t, 1H, J = 7.8), 6.84 (td, 1H, J = 15.6), 6.05 (d, 1H, J = 15.6), 2.20 (q, 2H, CH<sub>2</sub>, J = 7.2), 1.02 (t, 3H, CH<sub>3</sub>,

Supplementary Material for Chemical Communications  
This journal is © The Royal Society of Chemistry 2004

$J = 7.2$ ),  $^{13}\text{C}$  NMR spectrum (75.42 MHz,  $\text{DMSO-}d^6$ , ppm) 166.20, 163.52 (C=O), 158.82, 146.36, 134.07, 128.62, 120.65, 119.16, 117.32, 114.82, 24.65, 12.39; IR spectrum (KBr,  $\text{cm}^{-1}$ ): 3172, 3118, 3067, 1673, 1646 ( $\nu_{\text{C=N}}$  stretching), 1559, 1481.

**Details of crystal data collection.** Data collection was performed at  $-100\text{ }^{\circ}\text{C}$  with Mo  $K\alpha$  radiation ( $\lambda = 0.71073\text{ \AA}$ ) on a Bruker SMART CCD equipped with a graphite crystal, incident-beam monochromator. Lp and absorption corrections were applied to the data. Both structures were solved by direct methods and refined by full-matrix least-squares calculations with the *SHELXTL-PLUS* software package (Ver. 5.1).<sup>1</sup> One of the coordinate dmf is statistically disordered. Two additional non-coordinating dmf sites were observed, one of them was statistically disordered. Refinement of the structure converged at a final  $R1 = 0.0591$ ,  $wR2 = 0.1490$  for 5263 reflections of  $I > 2\sigma(I)$ ,  $R1 = 0.1229$ ,  $wR2 = 0.1744$  for all 9717 reflections. The largest difference peak and hole were  $0.722$  and  $-0.537\text{ e}\cdot\text{\AA}^{-3}$ , respectively. A summary of the crystal and intensity data is given in Table S1.

## References

- (1) Sheldrick, G. M. *SHELXTL-PLUS, Crystal Structure Analysis Package*; Bruker Analytical X-ray, Madison, WI, 1997.

Table S1. Crystal data and structure refinement for complex **1**.

|                                   |                                                                                                                                   |
|-----------------------------------|-----------------------------------------------------------------------------------------------------------------------------------|
| Empirical formula                 | $C_{216}H_{348}Mn_{12}N_{48}O_{60}$                                                                                               |
| Formula weight                    | 5236.70                                                                                                                           |
| Temperature                       | 173(2) K                                                                                                                          |
| Wavelength                        | 0.71073 Å                                                                                                                         |
| Crystal system                    | Rhombohedral                                                                                                                      |
| Space group                       | <i>R</i> -3                                                                                                                       |
| Unit cell dimensions              | $a = 23.7142(16)$ Å $\alpha = 90^\circ$ .<br>$b = 23.7142(16)$ Å $\beta = 90^\circ$ .<br>$c = 38.246(5)$ Å $\gamma = 120^\circ$ . |
| Volume                            | 18626(3) Å <sup>3</sup>                                                                                                           |
| Z                                 | 3                                                                                                                                 |
| Density (calculated)              | 1.401 Mg/m <sup>3</sup>                                                                                                           |
| Absorption coefficient            | 0.674 mm <sup>-1</sup>                                                                                                            |
| F(000)                            | 8280                                                                                                                              |
| Crystal size                      | 0.25 x 0.25 x 0.23 mm <sup>3</sup>                                                                                                |
| Theta range for data collection   | 1.46 to 28.28°.                                                                                                                   |
| Index ranges                      | -31 ≤ h ≤ 18, -31 ≤ k ≤ 31, -49 ≤ l ≤ 50                                                                                          |
| Reflections collected             | 32464                                                                                                                             |
| Independent reflections           | 9717 [R(int) = 0.0913]                                                                                                            |
| Completeness to theta = 28.28°    | 94.6 %                                                                                                                            |
| Absorption correction             | Semi-empirical from equivalents                                                                                                   |
| Max. and min. transmission        | 0.8604 and 0.8496                                                                                                                 |
| Refinement method                 | Full-matrix least-squares on F <sup>2</sup>                                                                                       |
| Data / restraints / parameters    | 9717 / 42 / 589                                                                                                                   |
| Goodness-of-fit on F <sup>2</sup> | 0.936                                                                                                                             |
| Final R indices [I > 2σ(I)]       | R1 = 0.0591, wR2 = 0.1490                                                                                                         |
| R indices (all data)              | R1 = 0.1229, wR2 = 0.1744                                                                                                         |
| Largest diff. peak and hole       | 0.722 and -0.537 e.Å <sup>-3</sup>                                                                                                |

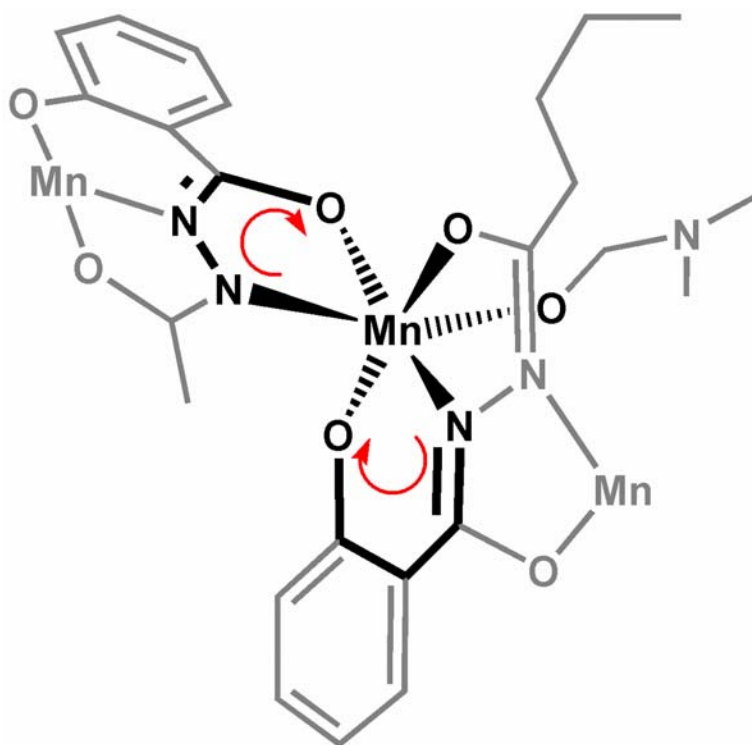

**Figure S1. Schematic diagram showing  $\Lambda$  configuration of the central metal ion in the metalladiazamacrocycle.**
